# Supplementary material
Source: PubMed Central journal article supplement (PMC2898355)
Supplement: supp_M110.109298_jbc.M110.109298-1.pdf [file supp_M110.109298_jbc.M110.109298-1.pdf]

**A**

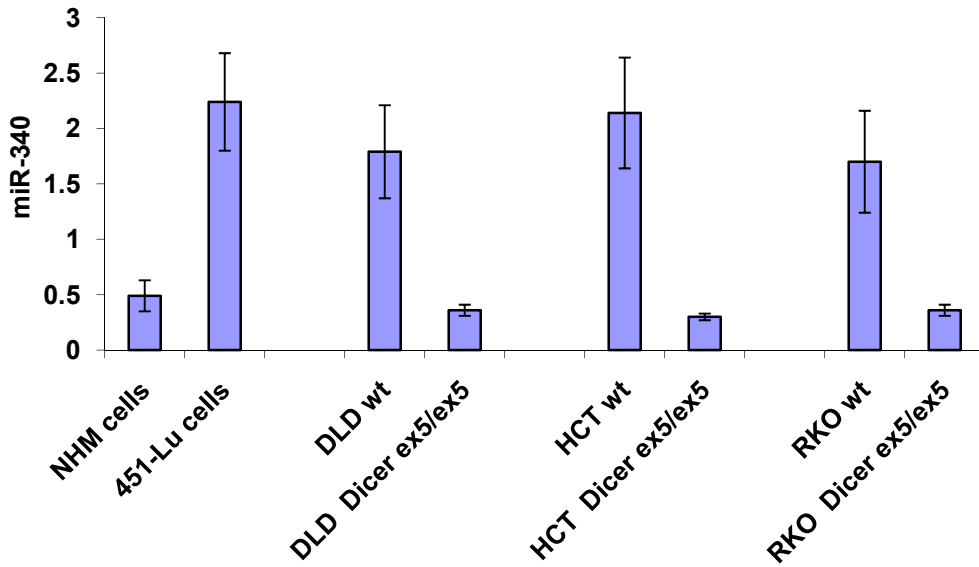

**B**

cgaauccuccugcacugcauucgcacaaacugcuuccuucuugauccguagauuuuaaacuaccugaagg  
 guuuucuugauaaauuuuccuuuaauaug**aaauuuuuuuucaugcuuuau**caauagcccaggauauauuuuau  
 uuuuagaauuuugugaaacagacuuguauauucuauuuuacaacuacaaaugccuccaaaguauuguacaaaua  
 agugugcaguaucugugaacugaauucaccacagacuuuagcuucugagcaagaggauuuugcgucagagaaau  
 gucuguccauuuuauucaggggaaacuugauuuugagauuuuaugccugugacuuccuuggaaaucaaaugua  
 aaguuuaauugaaagaauguaaagcaacaaaaaagaaaaaaaaaagaaagaagaggaaaaagaauccauac  
uaaccuuuuuccauuuuauaaanguauugauucauugguacugccuuuaagauacaguacccccuagcuuugu  
uuaguduuuauacugcaaacuauuuuaagaaauauguaauucuguaaaaaaaaaaaaaaaaa
