# Supplementary material
Source: PubMed Central journal article supplement (PMC2898355)
Supplement: supp_M110.109298_jbc.M110.109298-2.pdf [file supp_M110.109298_jbc.M110.109298-2.pdf]

**Supplemental Table 2**

| <b><u>Name of the Oligo</u></b> | <b><u>Sequence (5' → 3')</u></b>                           |
|---------------------------------|------------------------------------------------------------|
| GAPDH FWD                       | ATGGTTGCCACTGGGGATCT                                       |
| GAPDH REV                       | TGCCAAAGCCTAGGGGAAGA                                       |
| MITF FWD                        | CCAGGCATGAACACACATTC                                       |
| MITF REV                        | GCAGACCTTGTTTTCCATAAAG                                     |
| Zebrafish MITF homolog FWD      | GGCCGTCAAAAGGGAATTATC                                      |
| Zebrafish MITF homolog REV      | ATTCCACCTCATGTCTGGATC                                      |
| Zebrafish <i>α-tubulin</i> FWD  | CTGTTGACTACGAAAGAAGT                                       |
| Zebrafish <i>α-tubulin</i> REV  | TATGTGGACGCTCTATGTCTA                                      |
| Long 3'-UTR Detection FWD       | CCAAGAGGCAGTGGTTTGGG                                       |
| Long 3'-UTR Detection REV       | AACCAAATGCTTTAATGAGGCTATC                                  |
| Medium 3'-UTR Detection FWD     | GAAAACCGAACTGGGCATATTTT                                    |
| Medium 3'-UTR Detection REV     | GGTATCAATCTCCAAGAATATTGC                                   |
| Short 3'-UTR Detection FWD      | CGAATCCTCCCTGCACTGC                                        |
| Short 3'-UTR Detection REV      | ACAGAATACATATTTCTTTAAATAG                                  |
| Stem-loop RT primer for miR-340 | GTCGTATCCAGTGCAGGGTCCGAGGTATTTCGCACTG<br>GATACGACAATCAGTCT |
| Forward primer for miR-340:     | GCGGCGGTTATAAAGCAATG                                       |
| Universal reverse primer        | GCGGGTGCAGGGTCCGAGGT                                       |

**Supplemental Table 3**

| <b>Figure</b> | <b>Group</b>        | <b>Average half-life (hrs)</b> |
|---------------|---------------------|--------------------------------|
| 2A            | Wt                  | 2.5                            |
| 2A            | Ex5                 | 7.1                            |
| 2B            | Wt                  | 2.7                            |
| 2B            | Ex5                 | 5.6                            |
| 2C            | Wt                  | 2.6                            |
| 2C            | Ex5                 | 5.6                            |
| 3A            | Sponge CXCR4        | 3.2                            |
| 3A            | Sponge-340          | 6.6                            |
| 3B            | Sponge CXCR4        | 2.4                            |
| 3B            | Sponge 340          | 6.8                            |
| 3D            | WT                  | 2.8                            |
| 3D            | 340 mutant          | 5.1                            |
| 4E            | pcDNA               | 2.8                            |
| 4E            | CRD-BP              | 14                             |
| 6A            | Control             | 2.5                            |
| 6A            | Sponge-340          | 5.4                            |
| 6A            | CRD-BP              | 5.4                            |
| 6A            | CRD-BP + Sponge-340 | 5.3                            |
| 6E            | Control             | 6.4                            |
| 6E            | Sponge-340          | 7.8                            |
| 6E            | CRD-BP              | 6.8                            |
| 6E            | CRD-BP + Sponge-340 | 7.6                            |

The half life of mRNA ( $T_{1/2}$ ) was calculated as follows:

$$T_{1/2} = \frac{T \times \log 2}{\log \text{AmtB}/\text{AmtE}}$$

Where:

$T_{1/2}$  = Half Life of mRNA

T = Elapsed Time after addition of Doxycycline

AmtB = Average Beginning Amount of mRNA

AmtE = Average Ending Amount of mRNA
